# Supplementary material for: Identification of a transient state during the acquisition of temozolomide resistance in glioblastoma
Source: PubMed Central journal article supplement (PMC6944699; doi:10.1038/s41419-019-2200-2), 2020-01-06
Supplement: 41419_2019_2200_MOESM3_ESM.pdf [file 41419_2019_2200_MOESM3_ESM.pdf]

**A**

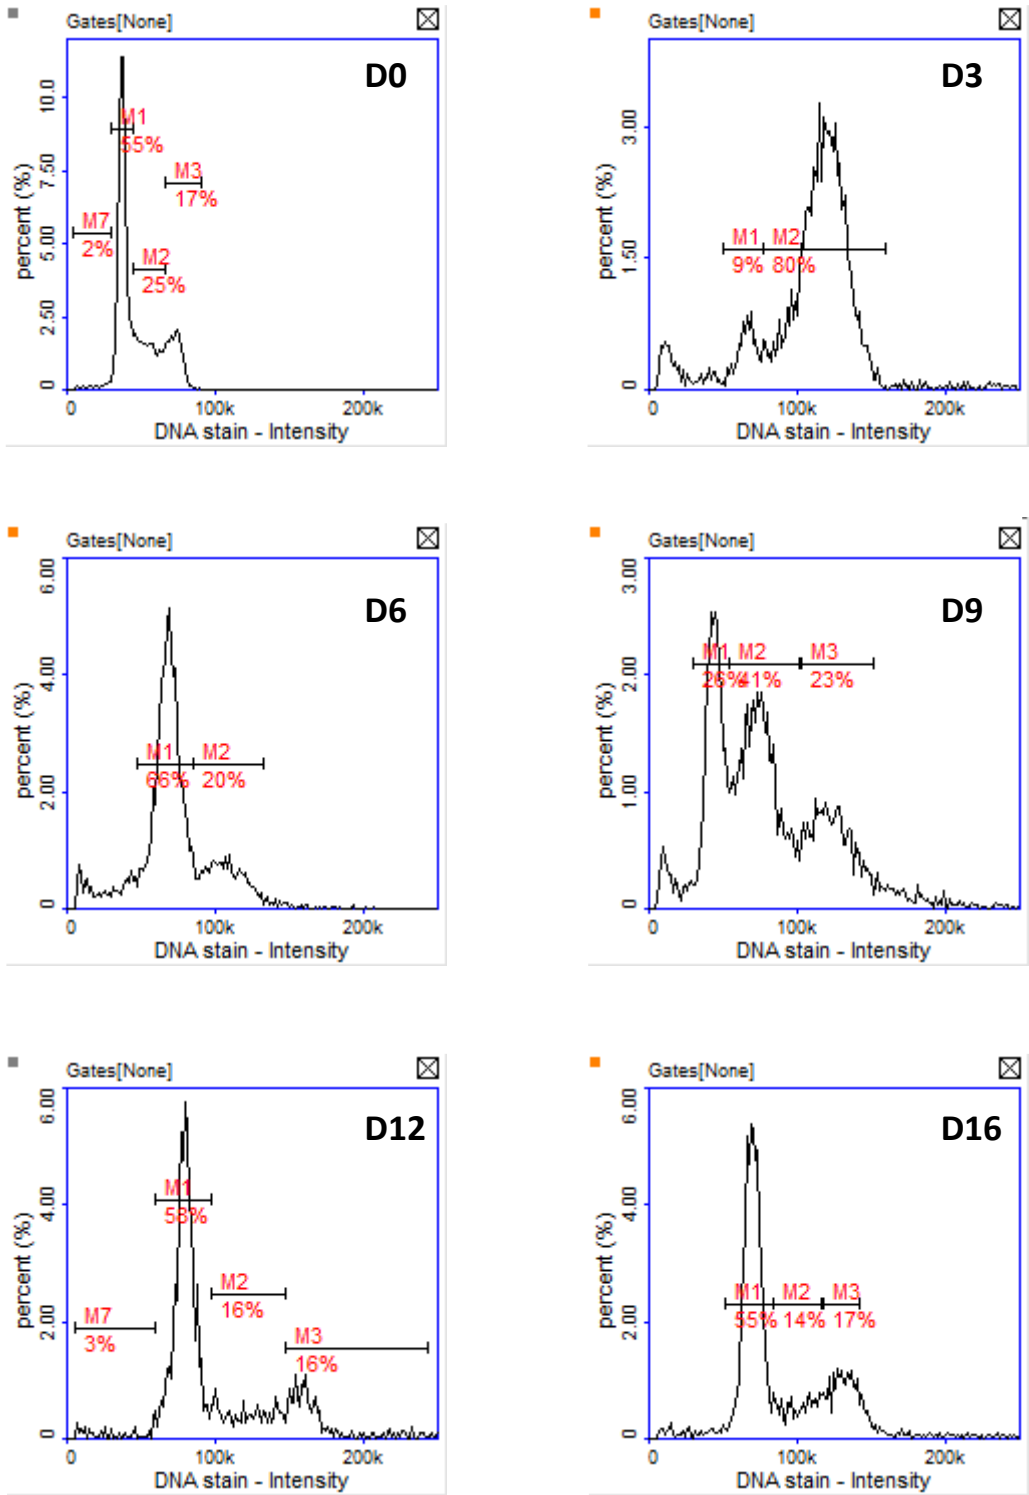

**Figure S1.** Cell cycle analysis of U251 cells without treatment and treated for 3, 6, 9, 12 and 16 days with TMZ 50 $\mu$ M. Data from one experiment representative of three.
