# Supplementary material for: Identification of a transient state during the acquisition of temozolomide resistance in glioblastoma
Source: PubMed Central journal article supplement (PMC6944699; doi:10.1038/s41419-019-2200-2), 2020-01-06
Supplement: 41419_2019_2200_MOESM8_ESM.pdf [file 41419_2019_2200_MOESM8_ESM.pdf]

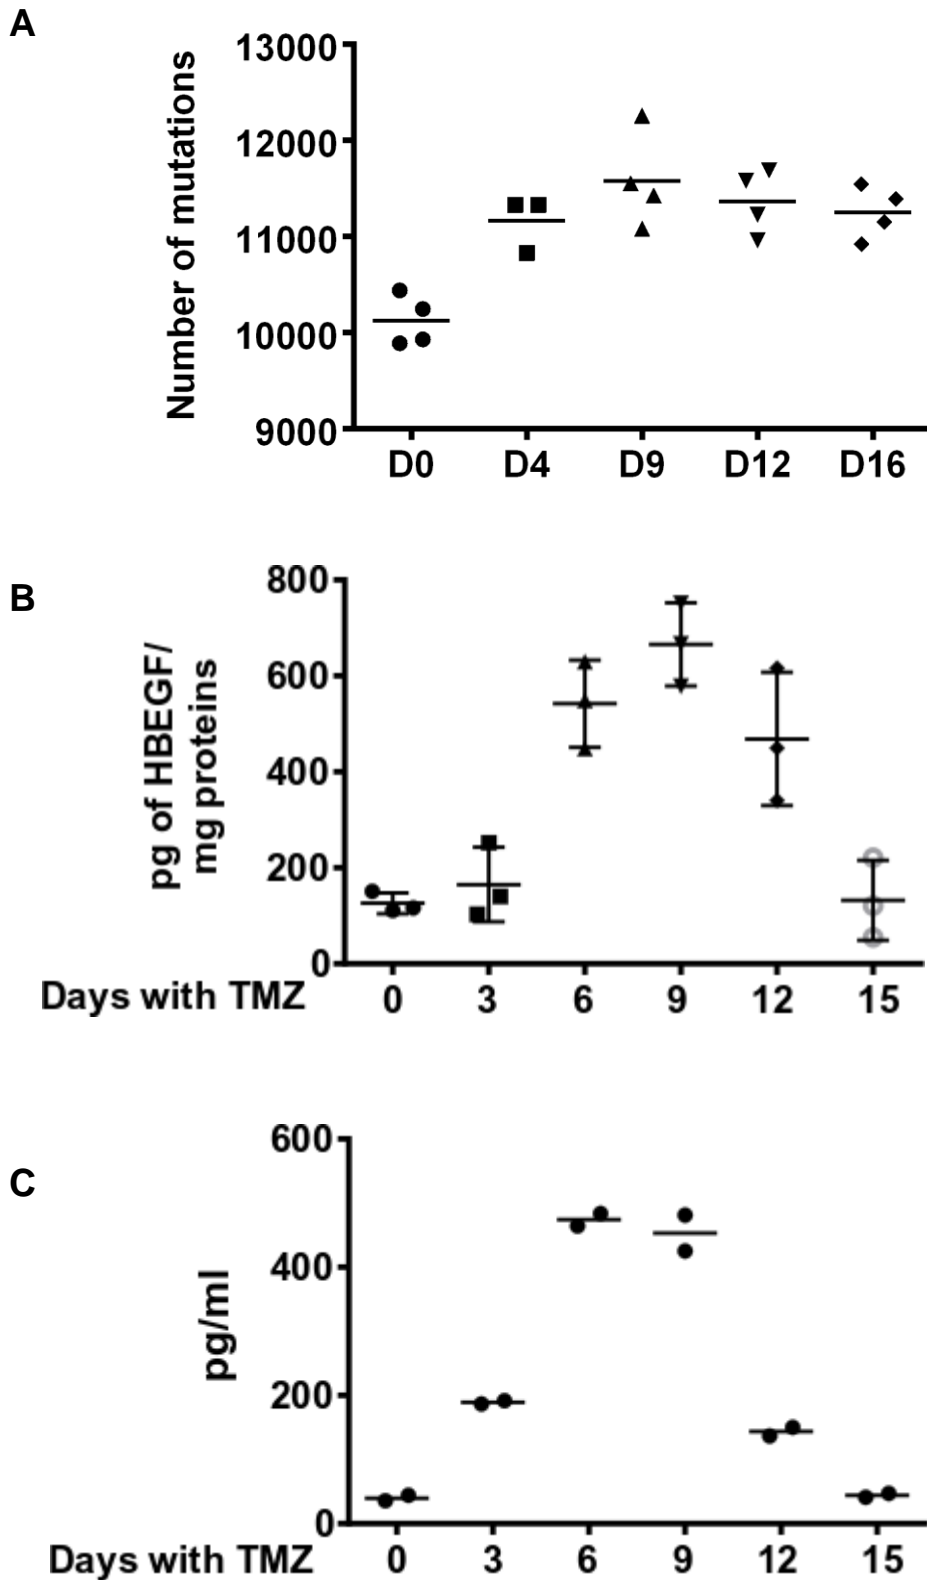

**Figure S5. (A)** Global mutations number during TMZ treatment, identified from RNA sequencing.

**(B)** HB-EGF in whole cell lysate during acquisition of resistance N=3

**(C)** CHI3L1 protein in the supernatant of U251 cells over the 15 days treatment. Graph is representative of one experiment of 3 (Elisa: n=2).
