# Supplementary material for: Identification of a transient state during the acquisition of temozolomide resistance in glioblastoma
Source: PubMed Central journal article supplement (PMC6944699; doi:10.1038/s41419-019-2200-2), 2020-01-06
Supplement: 41419_2019_2200_MOESM9_ESM.pdf [file 41419_2019_2200_MOESM9_ESM.pdf]

**A**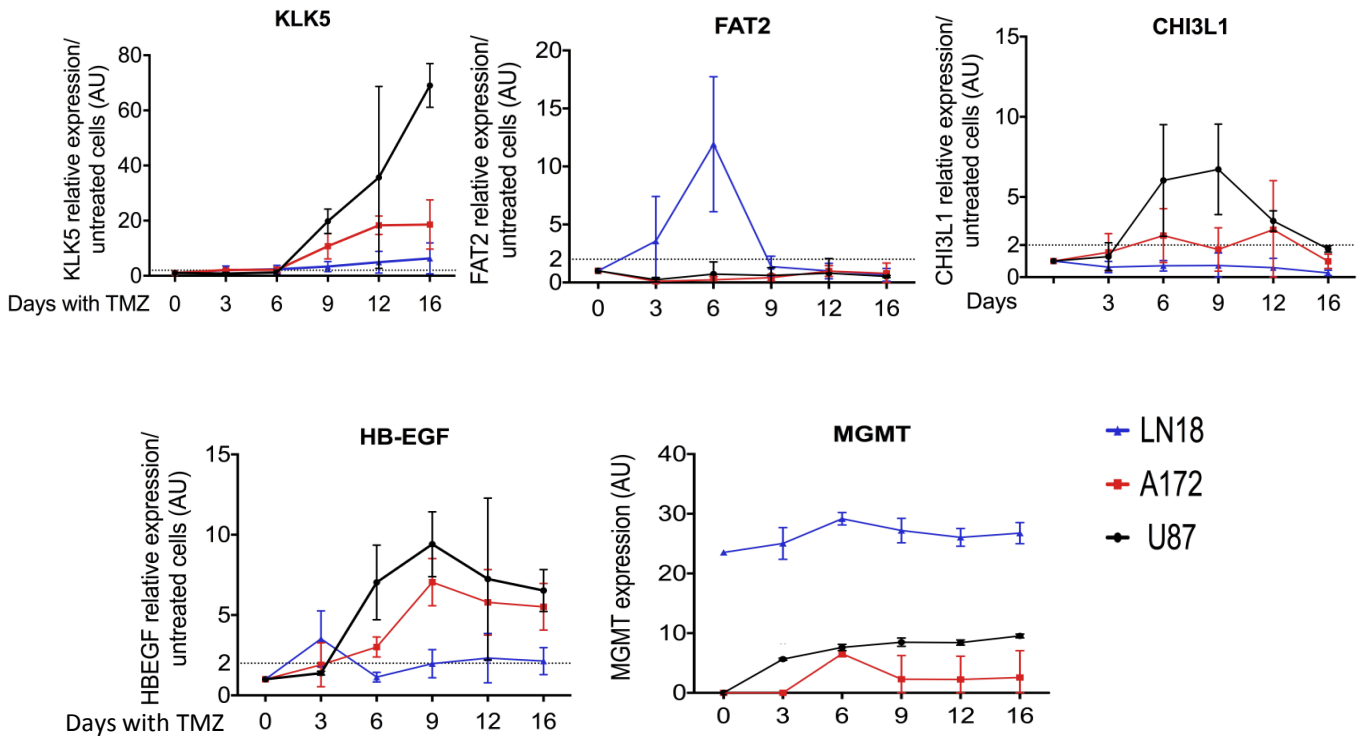**B**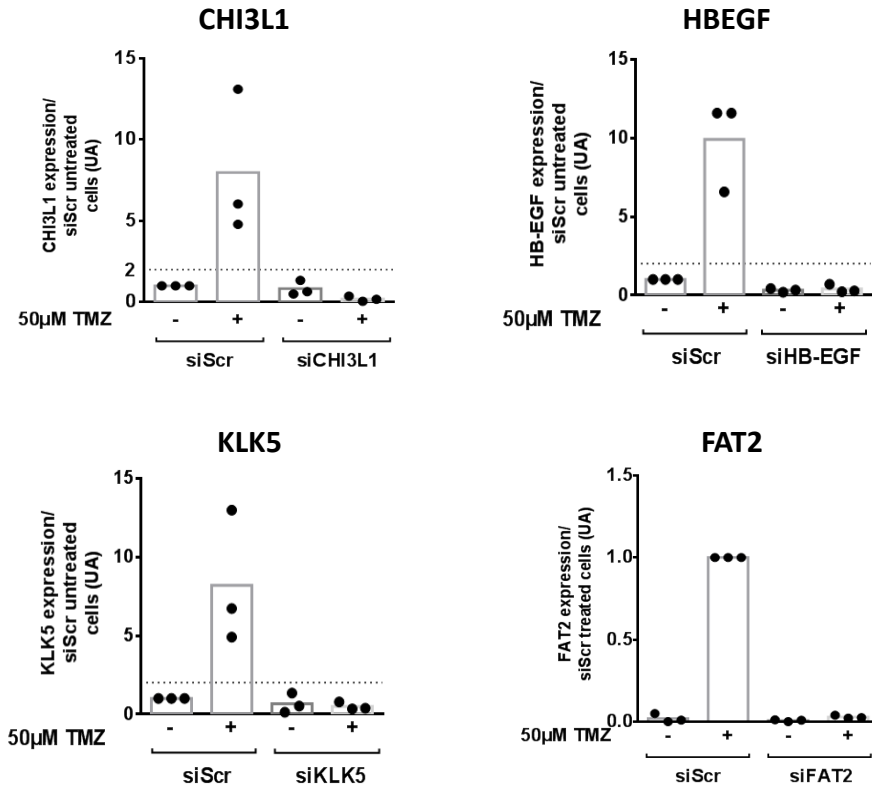

**Figure S6 (A)** KLK5, CHI3L1, FAT2, HB-EGF and MGMT expression in A172, U87, LN18 cell lines treated respectively by 50, 250 and 350 μM TMZ over 16 days (RT-qPCR).

**(B)** Expression of CHI3L1, HB-EGF, KLK5, and FAT2 in U251<sup>S</sup> cells knocked down for the respective gene with si RNA (RTqPCR). N=3
